# Supplementary material
Source: MDPI journal article supplement (https://www.mdpi.com/2073-4395/11/12/2584)
Supplement: s1 [file s1]

|     |       |       |       |       |       |       |       |       |       |       |       |       |       |       |       |       |       |       |       |       |
|-----|-------|-------|-------|-------|-------|-------|-------|-------|-------|-------|-------|-------|-------|-------|-------|-------|-------|-------|-------|-------|
| T13 | 0.933 | 0.937 | 0.939 | 0.937 | 0.931 | 0.943 | 0.937 | 0.943 | 0.933 | 0.941 | 0.818 | 1.000 |       |       |       |       |       |       |       |       |
| T14 | 0.832 | 0.835 | 0.840 | 0.835 | 0.837 | 0.830 | 0.832 | 0.828 | 0.835 | 0.832 | 0.938 | 0.817 | 0.817 |       |       |       |       |       |       |       |
| T15 | 0.805 | 0.807 | 0.806 | 0.811 | 0.809 | 0.806 | 0.808 | 0.814 | 0.807 | 0.804 | 0.910 | 0.796 | 0.796 | 0.937 |       |       |       |       |       |       |
| T16 | 0.964 | 0.964 | 0.958 | 0.960 | 0.958 | 0.962 | 0.964 | 0.959 | 0.960 | 0.968 | 0.816 | 0.929 | 0.929 | 0.831 | 0.804 |       |       |       |       |       |
| T17 | 0.950 | 0.946 | 0.959 | 0.949 | 0.948 | 0.951 | 0.942 | 0.940 | 0.938 | 0.942 | 0.805 | 0.919 | 0.919 | 0.821 | 0.800 | 0.938 |       |       |       |       |
| T18 | 0.966 | 0.966 | 0.964 | 0.962 | 0.957 | 0.968 | 0.955 | 0.957 | 0.951 | 0.959 | 0.809 | 0.920 | 0.920 | 0.824 | 0.810 | 0.951 | 0.971 |       |       |       |
| T19 | 0.972 | 0.972 | 0.970 | 0.976 | 0.966 | 0.974 | 0.964 | 0.963 | 0.957 | 0.961 | 0.817 | 0.930 | 0.930 | 0.832 | 0.808 | 0.964 | 0.957 | 0.970 |       |       |
| T20 | 0.976 | 0.972 | 0.966 | 0.972 | 0.963 | 0.974 | 0.961 | 0.963 | 0.957 | 0.961 | 0.817 | 0.930 | 0.930 | 0.826 | 0.802 | 0.964 | 0.953 | 0.967 | 0.992 |       |
| T21 | 0.768 | 0.770 | 0.769 | 0.770 | 0.772 | 0.769 | 0.770 | 0.767 | 0.770 | 0.767 | 0.903 | 0.765 | 0.765 | 0.881 | 0.876 | 0.763 | 0.758 | 0.760 | 0.768 | 0.768 |

**Table S3.** The genetic distance index matrix of bilberry accessions based on AFLP markers

|     | T1    | T2    | T3    | T4    | T5    | T6    | T7    | T8    | T9    | T10   | T11   | T12   | T13   | T14   | T15   | T16   | T17   | T18   | T19   | T20   |
|-----|-------|-------|-------|-------|-------|-------|-------|-------|-------|-------|-------|-------|-------|-------|-------|-------|-------|-------|-------|-------|
| T2  | 0.012 |       |       |       |       |       |       |       |       |       |       |       |       |       |       |       |       |       |       |       |
| T3  | 0.022 | 0.014 |       |       |       |       |       |       |       |       |       |       |       |       |       |       |       |       |       |       |
| T4  | 0.016 | 0.012 | 0.010 |       |       |       |       |       |       |       |       |       |       |       |       |       |       |       |       |       |
| T5  | 0.026 | 0.030 | 0.028 | 0.022 |       |       |       |       |       |       |       |       |       |       |       |       |       |       |       |       |
| T6  | 0.014 | 0.018 | 0.020 | 0.010 | 0.024 |       |       |       |       |       |       |       |       |       |       |       |       |       |       |       |
| T7  | 0.028 | 0.024 | 0.022 | 0.016 | 0.022 | 0.022 |       |       |       |       |       |       |       |       |       |       |       |       |       |       |
| T8  | 0.026 | 0.030 | 0.031 | 0.022 | 0.039 | 0.016 | 0.022 |       |       |       |       |       |       |       |       |       |       |       |       |       |
| T9  | 0.036 | 0.032 | 0.030 | 0.024 | 0.030 | 0.026 | 0.020 | 0.030 |       |       |       |       |       |       |       |       |       |       |       |       |
| T10 | 0.028 | 0.028 | 0.030 | 0.024 | 0.026 | 0.018 | 0.016 | 0.022 | 0.008 |       |       |       |       |       |       |       |       |       |       |       |
| T11 | 0.183 | 0.181 | 0.179 | 0.181 | 0.172 | 0.182 | 0.184 | 0.188 | 0.178 | 0.181 |       |       |       |       |       |       |       |       |       |       |
| T12 | 0.067 | 0.063 | 0.061 | 0.063 | 0.069 | 0.057 | 0.063 | 0.057 | 0.067 | 0.059 | 0.182 |       |       |       |       |       |       |       |       |       |
| T13 | 0.067 | 0.063 | 0.061 | 0.063 | 0.069 | 0.057 | 0.063 | 0.057 | 0.067 | 0.059 | 0.182 | 0.000 |       |       |       |       |       |       |       |       |
| T14 | 0.168 | 0.165 | 0.160 | 0.165 | 0.163 | 0.170 | 0.168 | 0.172 | 0.165 | 0.168 | 0.062 | 0.183 | 0.183 |       |       |       |       |       |       |       |
| T15 | 0.195 | 0.193 | 0.194 | 0.189 | 0.191 | 0.194 | 0.192 | 0.186 | 0.193 | 0.196 | 0.090 | 0.204 | 0.204 | 0.063 |       |       |       |       |       |       |
| T16 | 0.036 | 0.036 | 0.042 | 0.040 | 0.042 | 0.038 | 0.036 | 0.041 | 0.040 | 0.032 | 0.184 | 0.071 | 0.071 | 0.169 | 0.196 |       |       |       |       |       |
| T17 | 0.050 | 0.054 | 0.041 | 0.051 | 0.052 | 0.049 | 0.058 | 0.060 | 0.062 | 0.058 | 0.195 | 0.081 | 0.081 | 0.179 | 0.200 | 0.062 |       |       |       |       |
| T18 | 0.034 | 0.034 | 0.036 | 0.038 | 0.043 | 0.032 | 0.045 | 0.043 | 0.049 | 0.041 | 0.191 | 0.080 | 0.080 | 0.176 | 0.190 | 0.049 | 0.029 |       |       |       |
| T19 | 0.028 | 0.028 | 0.030 | 0.024 | 0.034 | 0.026 | 0.036 | 0.037 | 0.043 | 0.039 | 0.183 | 0.070 | 0.070 | 0.168 | 0.192 | 0.036 | 0.043 | 0.030 |       |       |
| T20 | 0.024 | 0.028 | 0.034 | 0.028 | 0.037 | 0.026 | 0.039 | 0.037 | 0.043 | 0.039 | 0.183 | 0.070 | 0.070 | 0.174 | 0.198 | 0.036 | 0.047 | 0.033 | 0.008 |       |
| T21 | 0.232 | 0.230 | 0.231 | 0.230 | 0.228 | 0.231 | 0.230 | 0.233 | 0.230 | 0.233 | 0.097 | 0.235 | 0.235 | 0.119 | 0.124 | 0.237 | 0.242 | 0.240 | 0.232 | 0.232 |

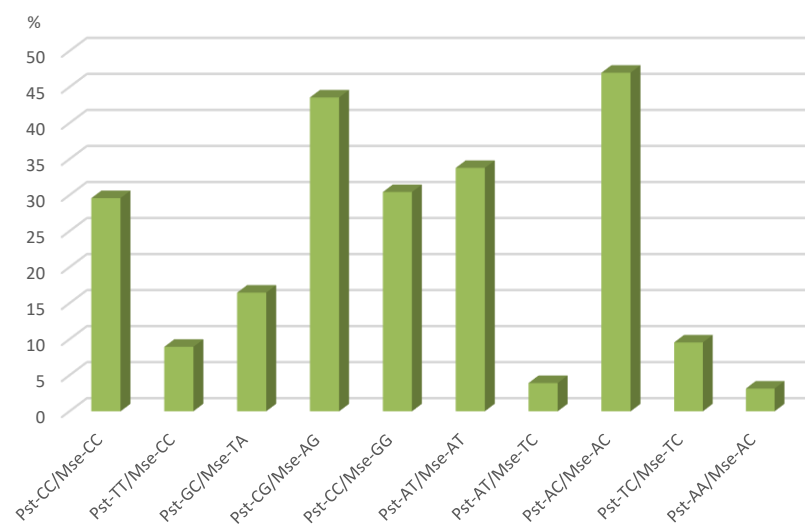

**Figure S1.** Polymorphism of AFLP products generated by primers selected to assess genetic diversity of bilberry accessions
